# Supplementary material
Source: Springer Nature journal article supplement (https://www.springermedizin.de/resource/supplementary/12913_2011_2025_MOESM3_ESM.pdf/9529672)
Supplement: MOESM3 [file 9529672]

FMEA probability scores

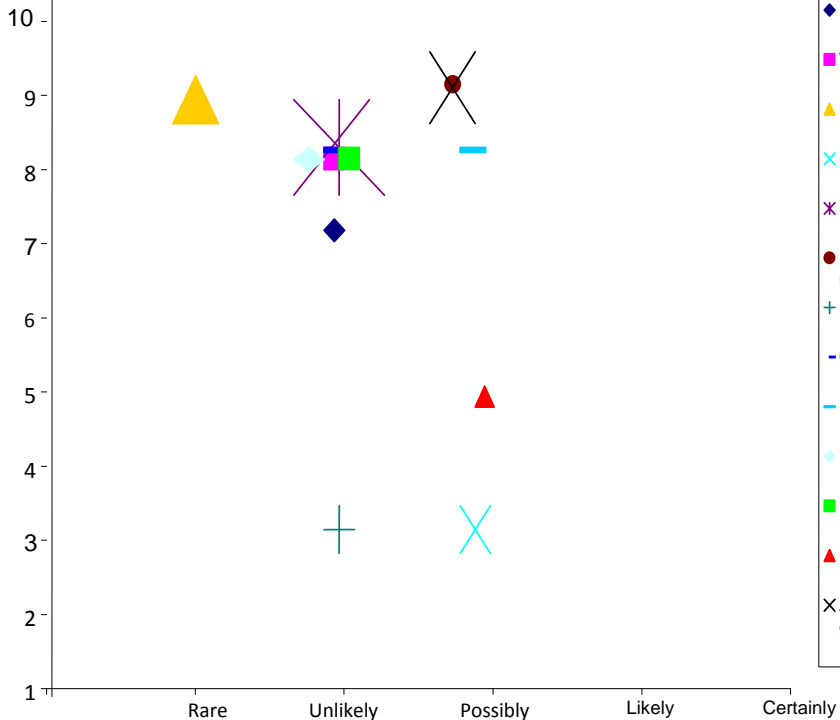

- ◆ Not considering renal function
- Wrong dose prescribed
- ▲ Not giving drug correctly
- × Not understanding/interpreting reported results
- × Not acting upon results because unable to Interpret drug level results
- Not communicating with consultants or other team members
- + Not stopping treatment when it should be stopped (FMEA group 1)
- Continuing treatment inappropriately (FMEA group 2)
- Not using ideal body weight for dose calculation
- ◊ Unclear changes on prescription chart
- Nurse unable to read prescription order
- ▲ Dose given at wrong time (FMEA group 1)
- × Administering the drug at incorrect time (FMEA group 2)

Hospital's incident reporting database probability scores
